# Supplementary material for: Reading a Suspenseful Literary Text Activates Brain Areas Related to Social Cognition and Predictive Inference
Source: PubMed Central journal article supplement (PMC4422438; doi:10.1371/journal.pone.0124550), 2015-05-06

**S1 Figure.** Statistical parametric maps for the additional parametric control regressors: (A) action; (B) arousal; (C) average sentence length of text segment ( $p < .05$ , cluster-level FWE-corrected, shown in neurological convention; red clusters represent brain regions that are positively related to the parametric regressor whereas blue clusters show a negative relationship).

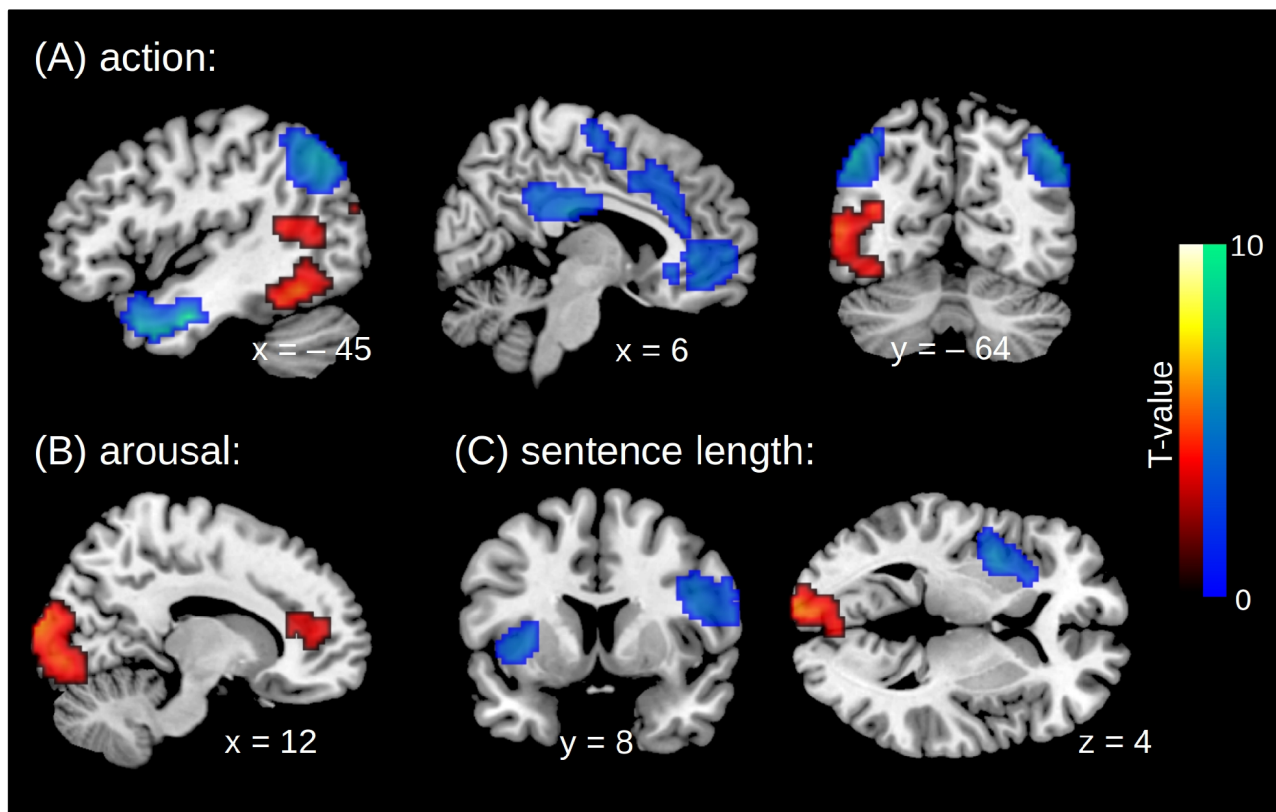

Supplement: pone.0124550.s004.pdf [file pone.0124550.s004.pdf]
