# Supplementary material for: Reading a Suspenseful Literary Text Activates Brain Areas Related to Social Cognition and Predictive Inference
Source: PubMed Central journal article supplement (PMC4422438; doi:10.1371/journal.pone.0124550), 2015-05-06

**S2 Figure.** Statistical parametric maps for the PPI analysis: (A) IFG seed region; (B) MFC seed region ( $p < .05$ , cluster-level FWE-corrected, shown in neurological convention).

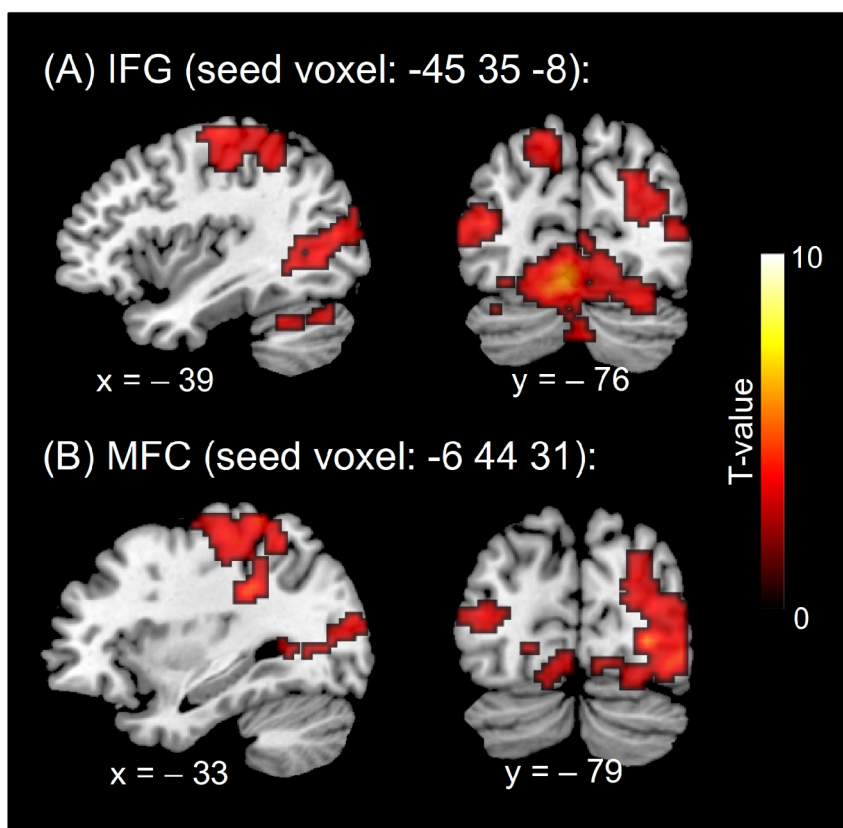

Supplement: pone.0124550.s005.pdf [file pone.0124550.s005.pdf]
