# Supplementary material for: Reading a Suspenseful Literary Text Activates Brain Areas Related to Social Cognition and Predictive Inference
Source: PubMed Central journal article supplement (PMC4422438; doi:10.1371/journal.pone.0124550), 2015-05-06
Supplement: pone.0124550.s007.pdf [file pone.0124550.s007.pdf]

**S2 Table.** GLM analysis: anatomical locations, peak MNI coordinates, T-values, and cluster sizes (number of voxels) of significant clusters for the additional parametric control regressors ( $p < .05$ , cluster-level FWE-corrected; indented regions are part of one continuous cluster). For the valence and imageability regressors no significant activation clusters were observed.

| anatomical location       | hemisphere | X (mm) | Y (mm) | Z (mm) | T-value | cluster size |
|---------------------------|------------|--------|--------|--------|---------|--------------|
| <b>action</b>             |            |        |        |        |         |              |
| posterior MTG             | L          | -54    | -58    | 10     | 6.82    | 470          |
| FFG                       | L          | -39    | -46    | -14    | 5.63    |              |
| posterior STS             | R          | 54     | -37    | 1      | 5.30    | 360          |
| <b>– action</b>           |            |        |        |        |         |              |
| temporal pole             | L          | -45    | -7     | -26    | 9.53    | 330          |
| IPL                       | L          | -48    | -64    | 43     | 6.88    | 274          |
| IPL                       | R          | 48     | -64    | 46     | 6.64    | 411          |
| MFC                       | R & L      | 0      | 56     | 4      | 5.32    | 1838         |
| posterior cingulate gyrus | R          | 3      | -40    | 34     | 3.99    | 413          |
| <b>arousal</b>            |            |        |        |        |         |              |
| visual cortex             | L          | -9     | -94    | 13     | 6.39    | 945          |
| visual cortex             | R          | 12     | -97    | 16     | 5.66    |              |
| anterior cingulate gyrus  | R          | 15     | 41     | 10     | 4.22    | 509          |
| <b>sentence length</b>    |            |        |        |        |         |              |
| visual cortex             | L          | -9     | -100   | 7      | 5.81    | 232          |
| <b>– sentence length</b>  |            |        |        |        |         |              |
| insular cortex            | L          | -39    | 2      | 1      | 6.15    | 237          |
| BA 44                     | R          | 45     | 8      | 28     | 4.33    | 212          |

FG: fusiform gyrus; IPL: inferior parietal lobule; MTG: middle temporal gyrus; MFC: medial frontal cortex; STS: superior temporal sulcus.
