# Supplementary material for: Reading a Suspenseful Literary Text Activates Brain Areas Related to Social Cognition and Predictive Inference
Source: PLoS One. 2015 May 6;10(5):e0124550. doi: 10.1371/journal.pone.0124550 (PMC4422438; doi:10.1371/journal.pone.0124550)
Supplement: S2 Dataset — (XLS) [file pone.0124550.s002.xls]

## Sheet: Sheet1
2	2	1	2	2	2	2	3	3	3	3	3	4	4	4	4	2	4	4	3	3	4	2	2	2	2	2	2	2	2	3	3	3	2	2	2	3	2	3	2	3	2	3	2	2	3	3	4	4	4
5	4	4	6	3	5	6	4	5	7	6	4	4	7	7	4	4	5	3	3	3	2	4	2	4	3	3	5	4	4	6	6	7	6	5	5	6	7	5	4	6	4	5	4	4	7	5	6	5	4
4	4	4	5	5	5	6	5	7	7	6	6	8	7	7	7	6	5	7	5	5	5	5	5	6	7	6	6	6	5	6	5	7	6	6	6	6	7	6	7	7	6	7	6	6	6	7	7	6	6
5	6	6	7	6	8	9	7	8	9	8	7	7	9	8	7	6	6	7	7	6	8	8	7	7	7	7	8	7	7	8	7	8	7	8	8	8	8	7	7	8	6	7	7	7	7	8	8	8	7
8	7	5	6	6	8	8	7	6	7	7	5	6	6	7	7	6	3	6	2	3	4	4	3	4	4	4	3	5	5	3	4	5	4	4	6	6	5	5	4	4	5	7	4	3	6	5	8	7	7
7	5	5	6	6	7	7	6	7	8	8	6	7	9	7	7	6	5	6	6	6	7	6	6	5	6	7	8	7	6	8	7	10	7	7	6	8	7	7	6	6	5	6	6	7	7	6	6	5	5
5	4	3	4	4	5	5	3	5	4	4	4	4	4	5	3	4	3	3	3	3	4	4	3	4	4	3	5	3	3	6	3	3	3	3	3	4	4	3	3	4	3	3	3	3	3	3	4	3	4
5	5	5	5	5	7	7	6	6	7	7	4	6	7	6	6	4	4	3	3	2	2	4	3	2	2	4	7	5	2	4	4	5	2	5	3	3	4	2	2	7	2	2	3	2	2	2	3	2	2
5	2	1	3	2	8	10	1	8	9	8	10	10	10	4	7	7	4	4	4	2	1	2	1	2	2	4	8	4	2	5	7	8	3	3	2	10	9	3	2	9	3	5	2	2	5	4	8	4	3
8	6	7	7	7	9	8	8	9	9	8	9	9	9	9	7	8	8	9	7	8	6	6	5	7	7	7	8	7	7	8	7	8	6	7	7	8	9	9	8	8	7	6	7	7	7	7	6	7	7
5	4	7	4	7	9	9	8	8	9	9	7	8	9	8	6	5	5	8	6	6	5	5	6	5	5	7	7	8	8	9	10	10	7	6	4	7	7	5	6	7	4	5	5	7	7	6	6	5	7
7	6	6	5	7	8	9	4	6	7	7	5	7	8	7	5	2	2	3	2	2	3	6	3	3	3	4	6	3	3	3	3	3	2	3	5	5	5	3	5	5	3	5	3	4	5	2	4	4	2
5	3	3	4	4	5	5	4	3	6	7	5	4	5	4	3	2	2	3	2	2	2	2	3	1	2	5	5	4	3	6	4	5	6	5	4	6	4	4	4	5	3	4	2	2	3	4	5	4	3
7	6	6	7	6	6	7	8	6	8	8	3	6	4	6	7	3	5	4	3	3	4	4	2	2	7	9	8	9	7	9	6	5	5	3	2	5	8	5	7	5	4	3	4	2	7	3	5	4	5
4	4	3	5	5	7	7	6	5	7	8	8	7	5	8	7	4	4	7	6	6	8	6	3	7	6	4	6	7	5	6	8	7	3	4	7	6	7	7	8	6	3	7	6	7	8	7	4	6	5
5	5	7	6	6	7	8	5	6	7	8	4	7	6	7	7	4	5	6	3	3	3	4	4	3	3	3	4	3	4	4	4	4	4	3	4	3	3	4	3	4	4	5	3	3	4	3	3	3	3
5	5	5	7	6	6	6	5	5	7	6	4	3	4	4	6	4	3	4	5	5	5	5	5	4	3	4	7	4	4	6	4	4	6	5	7	4	3	2	7	4	4	7	7	7	8	8	8	8	4
4	4	6	7	6	7	7	5	6	8	6	4	7	5	8	5	4	3	2	3	4	5	7	6	6	6	9	7	3	3	7	7	8	9	6	7	6	6	4	5	2	4	4	5	6	6	5	7	4	7
6	7	7	9	8	8	8	8	9	10	9	10	10	10	10	9	6	6	8	8	7	6	7	6	5	6	7	7	6	6	6	8	8	6	7	7	8	9	9	7	7	5	7	6	5	4	3	2	3	2
6	6	4	8	8	8	9	5	7	8	7	7	8	9	7	7	3	3	2	3	3	3	6	3	3	1	5	7	6	7	6	8	9	5	5	6	9	9	5	3	9	6	5	3	5	5	4	8	2	5
7	7	3	4	4	8	10	4	6	9	9	8	9	8	2	2	5	4	7	3	7	3	6	5	4	4	7	7	7	6	8	8	9	8	3	8	8	10	8	9	8	4	8	3	10	9	8	8	7	8
7	7	8	8	8	7	8	7	8	9	8	7	8	9	7	8	5	5	7	5	4	5	7	6	8	5	6	8	8	6	7	8	8	4	5	4	9	7	8	6	8	6	6	6	7	7	6	7	8	8
6	6	5	7	6	7	7	6	8	7	5	5	6	6	7	6	7	4	6	2	3	4	5	4	3	7	6	4	7	5	8	6	5	4	4	6	7	8	7	7	5	6	4	4	6	5	7	7	7	5
[truncated: 15 more columns]
